# Supplementary material for: Mapping the dynamics and nanoscale organization of synaptic adhesion proteins using monomeric streptavidin
Source: PubMed Central journal article supplement (PMC4799371; doi:10.1038/ncomms10773), 2016-03-16
Supplement: ncomms10773-s1.pdf [file ncomms10773-s1.pdf]

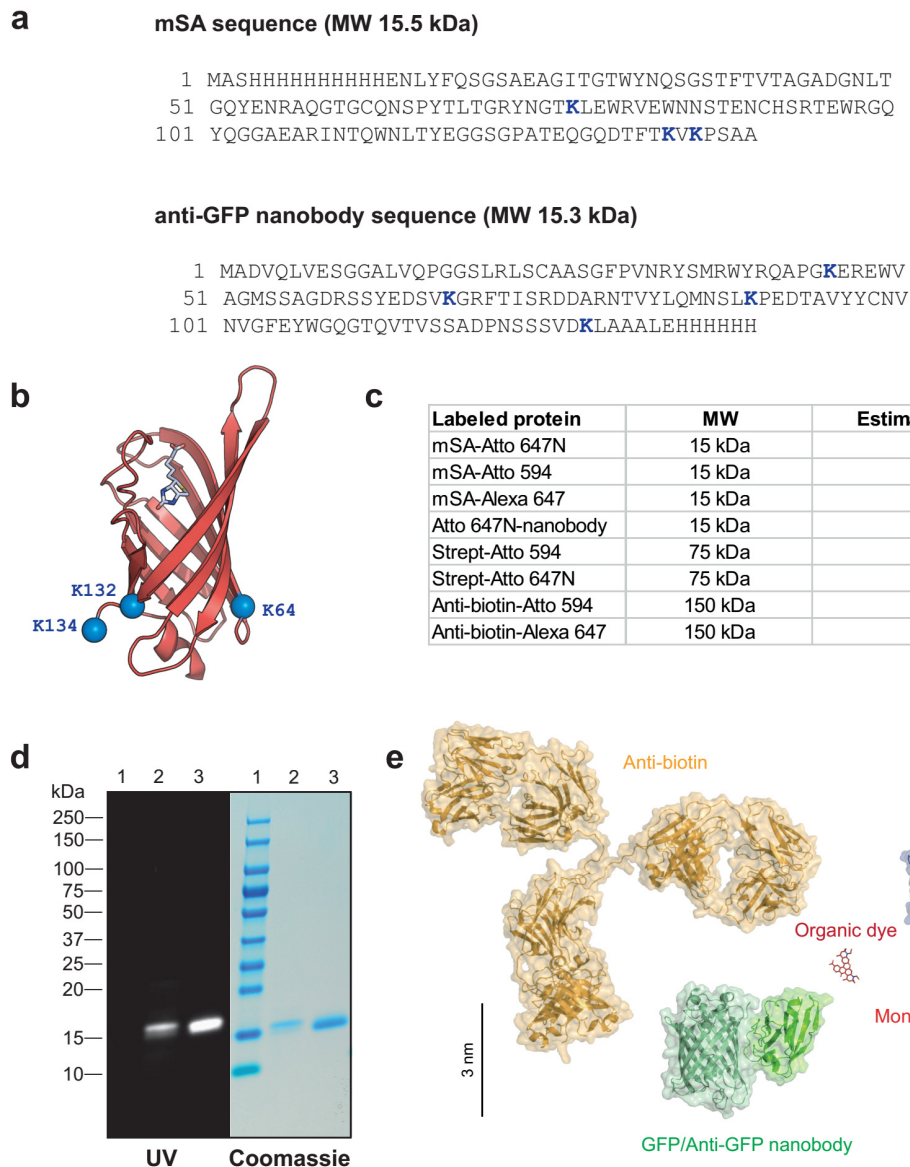

### Supplementary Figure 1. Label production and fluorophore conjugation

**(a)** Sequences of mSA and GFP nanobody with lysine residues in bold blue. **(b)** Structure of mSA (adapted from PDB entry 4JNJ), with lysines highlighted in blue and the biotin in stick representation. **(c)** Degree of labeling (DOL) obtained for all the conjugated proteins used in the study, except for streptavidin-Alexa647 which was purchased. **(d)** Illustrative SDS-PAGE of conjugated mSA and GFP nanobody. Left, fluorescence image obtained with UV illumination and emission filtered at 655 nm; right, Coomassie staining of the corresponding gel. 1: molecular weight ladder; 2: mSA-Atto 594; 3: Atto 647N-GFP nanobody. **(e)** Size comparison between biotin antibody (adapted from PDB entry 1IGT), tetrameric streptavidin (adapted from PDB entry 3RY2), monomeric streptavidin (adapted from PDB entry 4JNJ), GFP and anti-GFP Nanobody complex (PDB entry 3G9A), and an Atto dye.

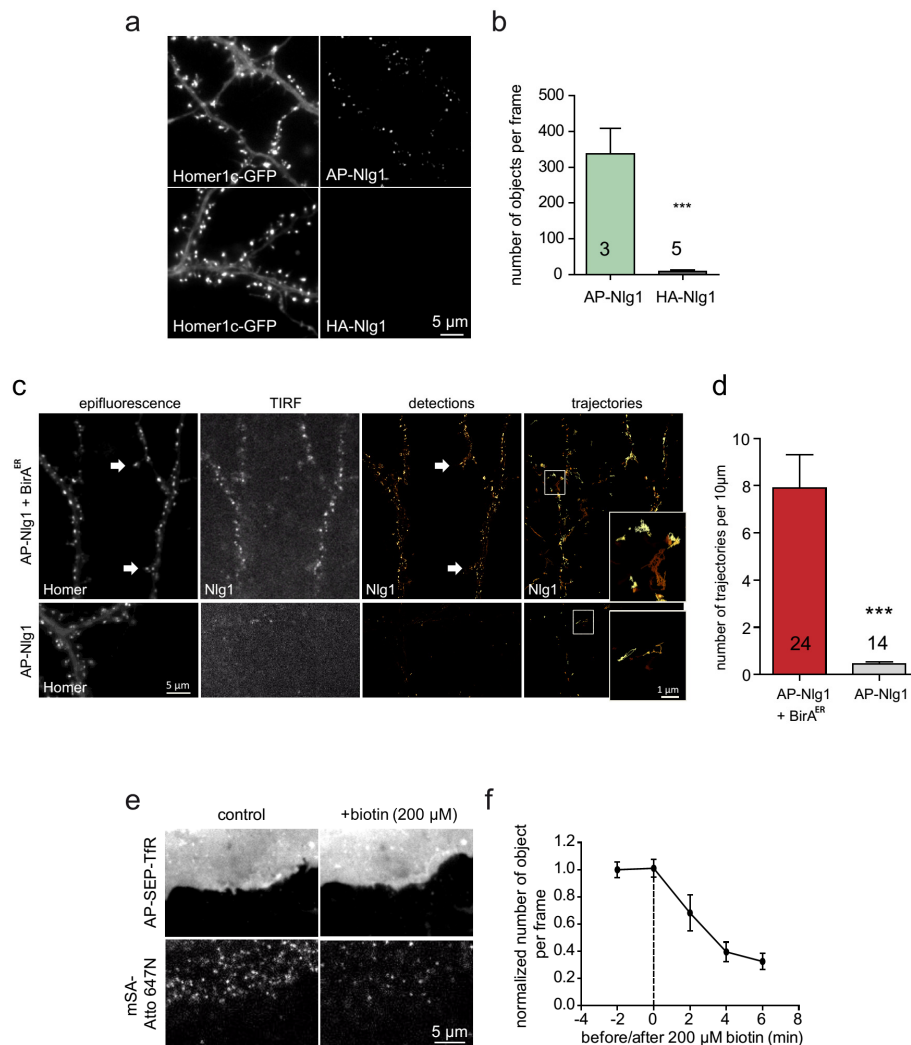

### Supplementary Figure 2. mSA specifically labels biotinylated AP-tagged proteins

**(a)** DIV15 hippocampal neurons were electroporated with the synaptic marker Homer1c-GFP, AP-Nlg1 or non biotinylatable HA-Nlg1, plus BirA<sup>ER</sup>. Biotinylated AP-Nlg1 was successfully labeled with mSA-Atto 594 at the cell surface (top right), whereas no labeling of HA-Nlg1 was detected (bottom right). **(b)** Mean number of single molecules detected per frame from neurons expressing AP-Nlg1 or HA-Nlg1 (\*\*\*,  $p < 0.0001$ , data are from one experiment). **(c)** DIV 15 hippocampal neurons electroporated with Homer1c-GFP, AP-Nlg1, and with (top) or without (bottom) BirA<sup>ER</sup>. AP-Nlg1 was successfully labeled with mSA-Atto 594 in the presence of BirA<sup>ER</sup> but no labeling was detected when BirA<sup>ER</sup> was omitted. **(d)** Mean number of single molecules per frame from neurons expressing AP-Nlg1 and BirA<sup>ER</sup> or AP-Nlg1 alone (\*\*\*,  $p < 0.0001$ , Data are from 2 different cultures). **(e)** COS-7 cells expressing AP-tagged SEP-transferrin receptor (AP-SEP-TfR) were labeled with mSA-Atto 647N. Bound mSA was washed off with 200 µM biotin, showing the specificity and reversibility of labeling. **(f)** Normalized labeling density of mSA-Atto 647N stained cells before and after addition of excess biotin ( $n = 4$  from 2 different experiments, mean  $\pm$  sem).

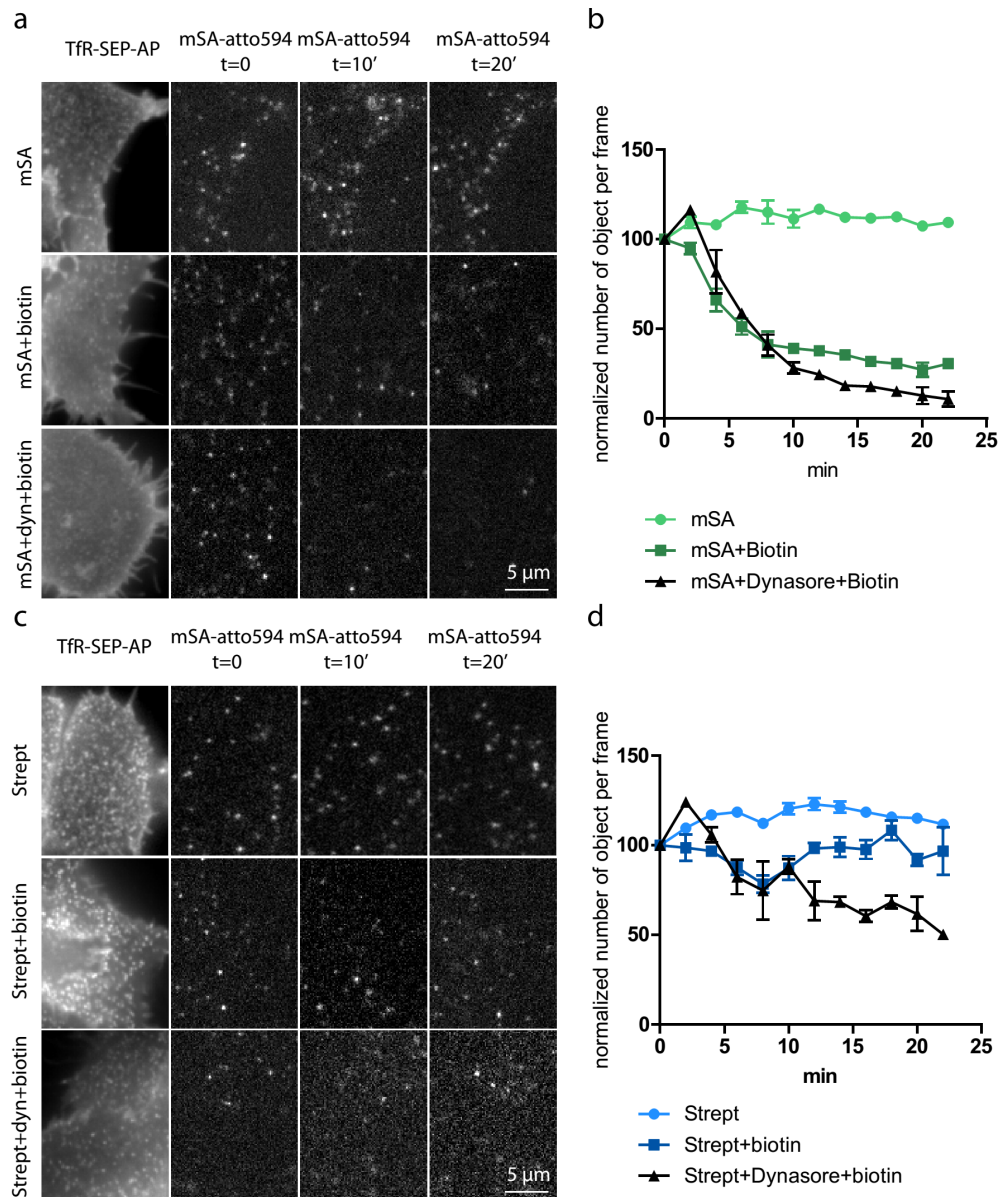

### Supplementary Figure 3. Biotin washout of surface mSA to access intracellular compartments

**(a, c)** HEK-293 cells expressing the transferrin receptor AP-TfR-SEP and BirA<sup>ER</sup> were labeled with mSA-Atto594 (a) or streptavidin-Atto594 (c). Stacks of 100 frames at a 50 ms exposure time were acquired every 2 min for 22 min, and the number of detected particles per stack was averaged per frame and normalized to the first acquisition (t = 0). Where indicated, 50  $\mu$ M dynasore was added to the imaging medium at t = -10 min to inhibit endocytosis, and 200  $\mu$ M non permeable biotin was added at t = 3 min. **(b, d)** Normalized mean particle per frame detected with mSA (b) or streptavidin (d) in control (mSA, n=3; Strept, n=2), biotin (mSA, n=10; Strept, n=4), or dynasore and biotin (mSA, n=8; Strept, n=2), over time. Biotin efficiently washed out the extracellular mSA signal coupled to TfR-SEP-AP (a, b), but not the streptavidin signal (c, d), allowing us to visualize internalized proteins. Data are from 2 different experiments.

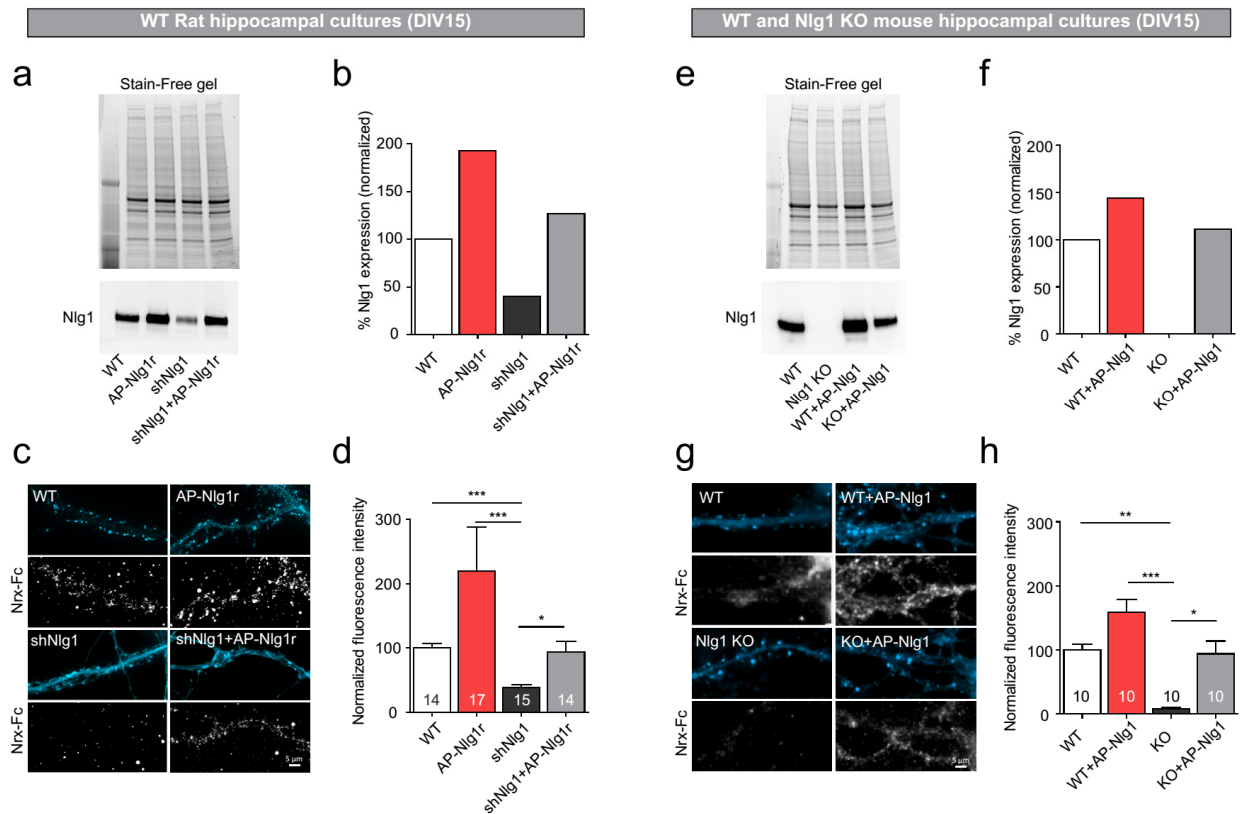

**Supplementary Figure 4. Overexpression and rescue of AP-Nlg1 in rat and mouse hippocampal neurons**

**(a-d)** Rat hippocampal neurons were electroporated at DIV0 either with an empty vector, AP-Nlg1r, shNlg1, or shNlg1 + AP-Nlg1r and processed at DIV15. **(a)** Anti-Nlg1 immunoblot revealing the Nlg1 protein level in the 4 different conditions, the above stain-free gel serving as a control of sample loading. **(b)** Quantification of Nlg1 levels, normalized to the condition of neurons expressing empty vector. **(c)** In parallel coverslips, neurons were live surface labeled with soluble Nr1 $\beta$ -Fc, fixed, and immuno-stained with Cy5-conjugated anti-human-Fc antibody. **(d)** Normalized Cy5 fluorescence intensity in the 4 conditions. **(e-h)** Mouse hippocampal neurons from wild-type or Nlg1 KO mice were electroporated at DIV0 either with an empty vector or AP-Nlg1 and processed at DIV15. **(e)** Western blot showing the levels of Nlg1 protein in the 4 conditions and corresponding stain-free gel. **(f)** Normalized Nlg1 protein levels. **(g)** Representative images of Nr1 $\beta$  binding in the 4 conditions. **(h)** Nlg1 membrane expression quantified using the Nr1 $\beta$  binding assay in the same set of experiment. A ratio of two in the Nr1 $\beta$ -Fc signal between cells expressing AP-Nlg1 and cells not expressing AP-Nlg1 indicates that there is roughly one copy of AP-Nlg1 for one copy of endogenous Nlg1. Data are from one experiment for each condition.

**a**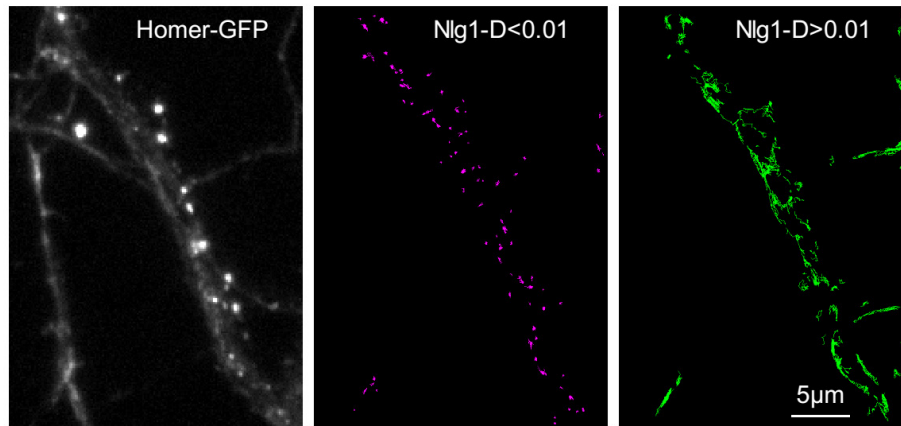**b**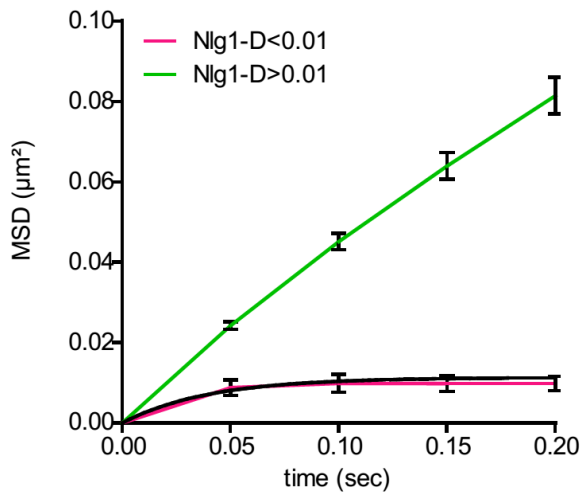**c**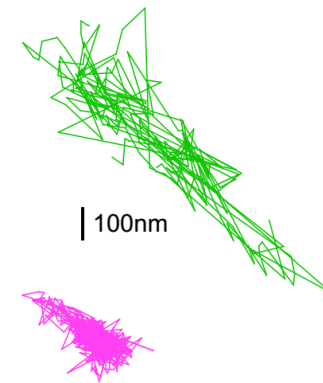

### Supplementary Figure 5. Quantitative discrimination between slow and fast diffusing molecules

**(a)** DIV 15 hippocampal neurons expressing Homer1c-GFP, AP-Nlg1, and BirA<sup>ER</sup> were labeled with mSA-Atto594 and AP-Nlg1 molecules tracked by uPAINT. Diffusion coefficients inferior to  $0.01 \mu\text{m}^2 \text{s}^{-1}$  (defined as the threshold for slow trajectories, see material and methods) are represented in magenta, and diffusion coefficients superior to  $0.01 \mu\text{m}^2/\text{s}$  are shown in green. **(b)** Average mean squared displacement (MSD) over time for trajectories with  $D > 0.01 \mu\text{m}^2 \text{s}^{-1}$  (linear, green,  $n=4$ , 2411 trajectories), and  $D < 0.01 \mu\text{m}^2 \text{s}^{-1}$  (confined, magenta,  $n=4$ , 2112 trajectories). The diffusive MSD curve was fitted by a linear equation  $\text{MSD}(t) = 4Dt$ . The confined MSD curve was fitted to the one-phase exponential equation  $\text{MSD}(t) = (L^2/3)(1-\exp(-t/\tau))$ , where  $L$  is the confinement diameter and  $\tau$  is a time constant<sup>69</sup>. The confinement diameter ( $L$ ) was determined to be  $\sim 118 \text{ nm}$ . **(c)** Representative trajectories with  $D > 0.01 \mu\text{m}^2 \text{s}^{-1}$  (green) and  $D < 0.01 \mu\text{m}^2 \text{s}^{-1}$  (magenta). Data are from 3 different experiments.

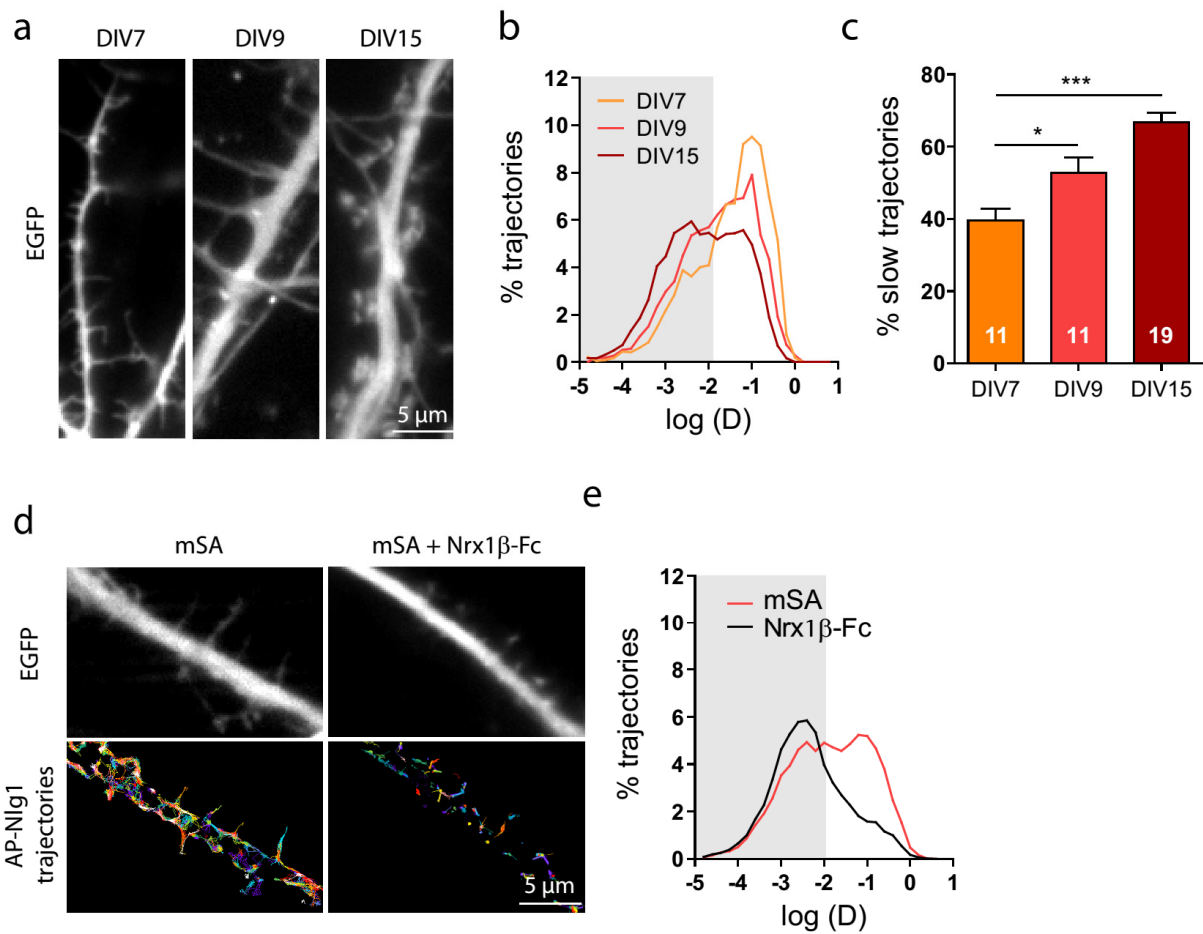

**Supplementary Figure 6. Age-dependent decrease of Nlg1 diffusion and stabilizing effect of Nr1 $\beta$  binding**

**(a)** EGFP signal in DIV 7, 9 or 15 neurons expressing EGFP, AP-Nlg1, and BirA<sup>ER</sup> and showing the progressive maturation of dendritic filopodia into spines. **(b)** Distribution of AP-Nlg1 diffusion coefficients across neuronal development (DIV7, n=11; DIV9, n=11; DIV15, n=19 from 2 different experiments). Note the progressive reduction in diffusion coefficient as neurons grow older. **(c)** Corresponding percentage of slow trajectories with  $D < 0.01 \mu\text{m}^2 \text{s}^{-1}$  (\*,  $p < 0.05$ ; \*\*\*,  $p < 0.0001$ ). **(d)** EGFP images of dendritic segments of DIV 15 neurons and corresponding trajectories of AP-Nlg1 labeled with mSA-Atto594, upon acute addition of vehicle or Nr1 $\beta$ -Fc dimers. **(e)** Corresponding distribution of AP-Nlg1 diffusion coefficients in the two conditions (mSA, n=12; mSA + Nr1 $\beta$ -Fc, n=7 cells from 2 different experiments). Note that addition of Nr1 $\beta$ -Fc reduces AP-Nlg1 diffusion, indicating that insertion of the AP tag does not alter Nlg1 binding to Nr1 $\beta$ , and confirming the previously identified mechanism that Nr1 $\beta$  binding to Nlg1 triggers the synaptic anchorage of Nlg1 via PSD-95<sup>31</sup>.

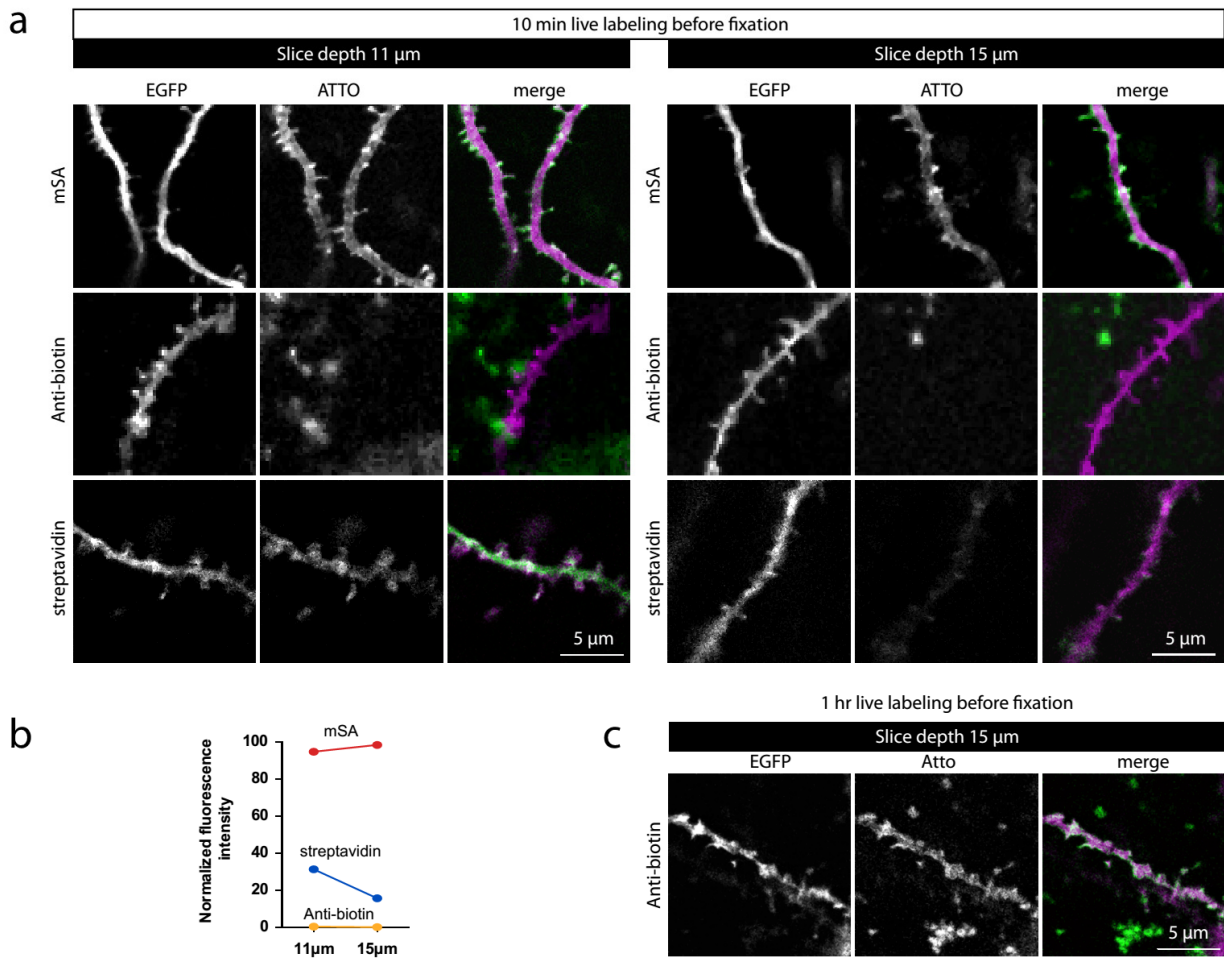

**Supplementary Figure 7. mSA efficiently labels Nlg1 within deep and confined tissue environment**

**(a)** Live neurons from organotypic hippocampal slices electroporated with EGFP, AP-Nlg1, and BirA<sup>ER</sup>, were labeled for 10 min with mSA-Atto647N (top), anti-biotin-Atto594 (middle), or streptavidin-Atto647N (bottom) before fixation. At 15  $\mu\text{m}$  from slice surface, only mSA efficiently labeled AP-Nlg1, whereas at 11  $\mu\text{m}$ , streptavidin and mSA labeled AP-Nlg1. **(b)** Quantification of the fluorescence intensity in the three different conditions shown in (a) normalized to the GFP intensity and to the degree of labeling of each probe (Supplementary Fig. 1). **(c)** After a 1 hr live labeling, anti-biotin-Atto594 was able to efficiently label AP-Nlg1 at the same sample depth. Data are from 2 slice cultures.

a

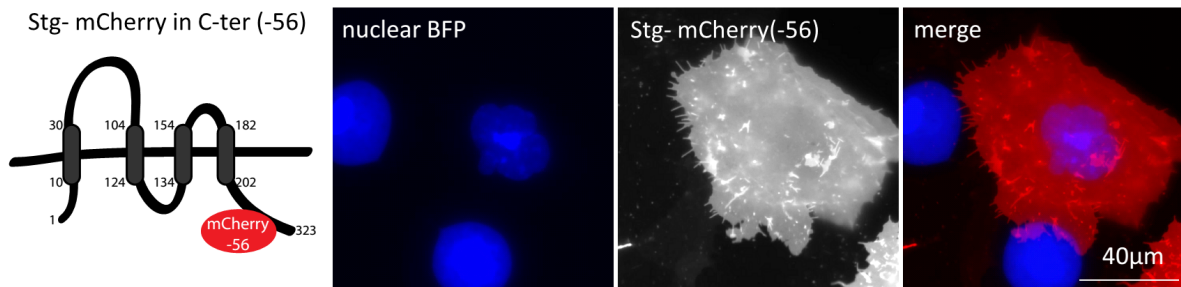

b

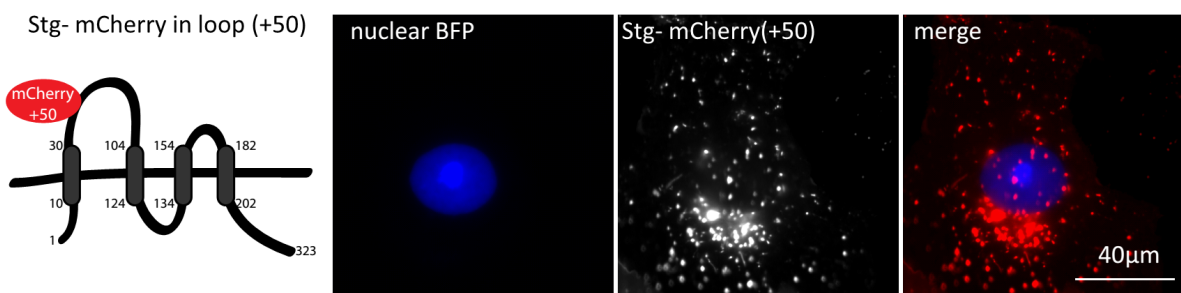

**Supplementary Figure 8. Insertion of mCherry in the stargazin extra-cellular loop disrupts the targeting of stargazin to the plasma membrane. (a)** When mCherry is inserted at position -56aa before the C-terminus of stargazin, the protein expressed in COS-7 cells is targeted to the cell membrane. **(b)** When mCherry is inserted with the first extracellular loop of stargazin, the protein remains in intracellular compartments. The nucleus is stained with co-expressed nuclear BFP (blue), and the mCherry signal is shown in red.



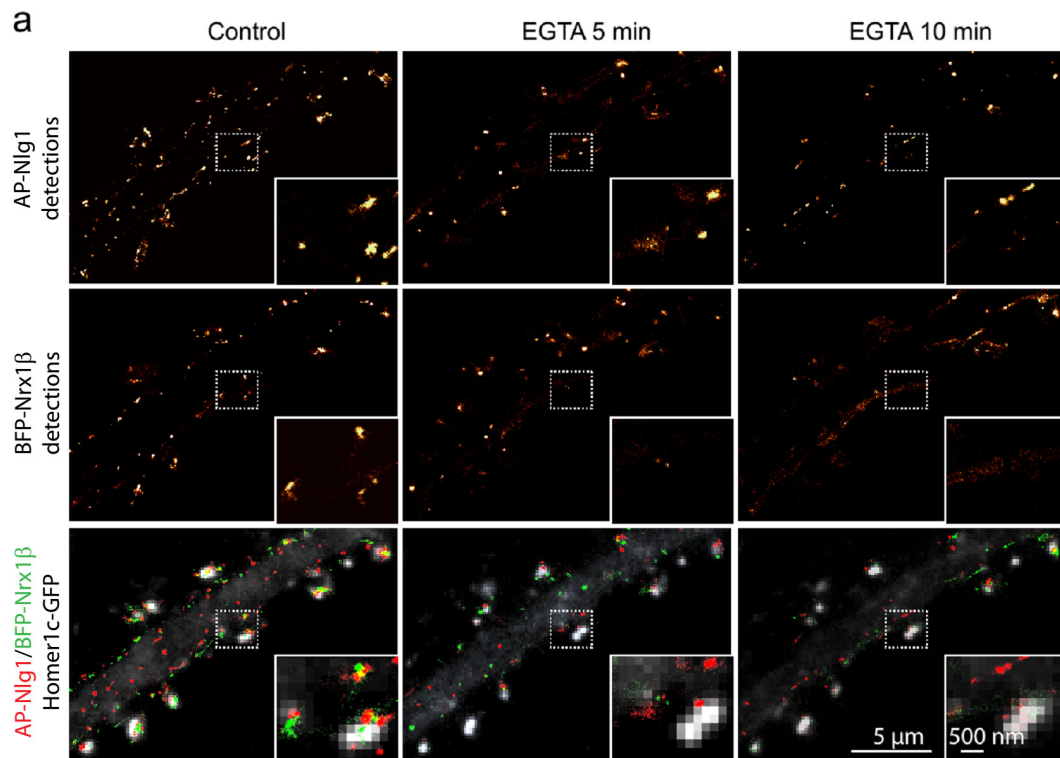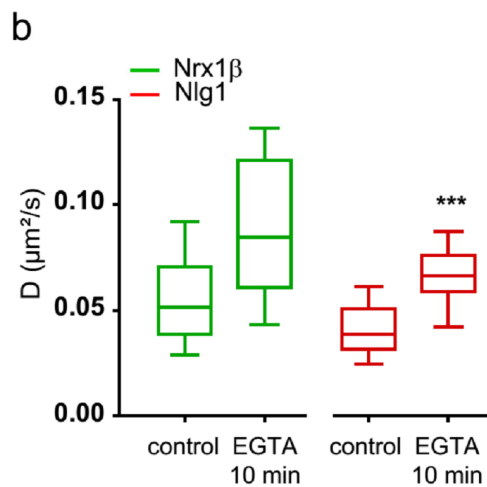

**Supplementary Figure 9. Destabilization of trans-synaptic Nrx1 $\beta$ /Nlg1 adhesion by EGTA**

**(a)** Dual-color uPAINT imaging of BFP-Nrx1 $\beta$  and AP-Nlg1 labeled with GFP nanobody-Atto647 and mSA-Atto594, respectively at axon/dendrite contacts of DIV15 neurons. Acute addition of EGTA (10 mM) induced a gradual loss of Nrx1 $\beta$  and Nlg1 from synapses. **(b)** Median  $\pm$  IQR diffusion coefficient of BFP-Nrx1 $\beta$  (green) and AP-Nlg1 (red) molecules before and after EGTA treatment (n=6 cells for each condition from 2 different experiments, \*\* p < 0.01).

**a**

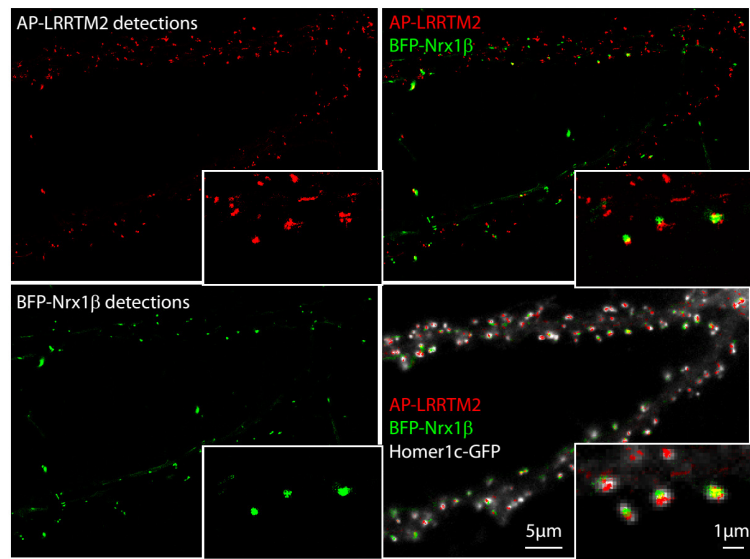

**b**

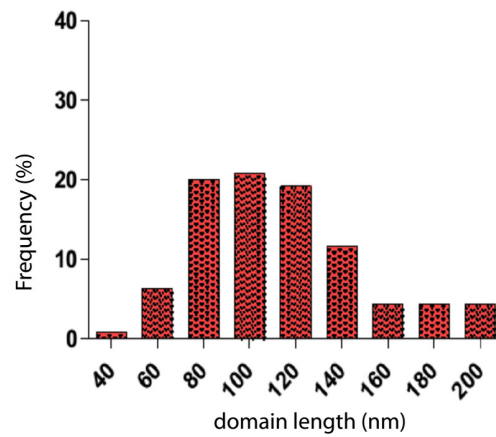

**Supplementary Figure 10. Dual-color super resolution imaging of trans-synaptic contacts between Nrx1β and LRRTM2**

**(a)** Neurons co-expressing AP-LRRTM2, BirA<sup>ER</sup>, and Homer1c-GFP, or expressing BFP-Nrx1β were co-cultured for 15 days and labeled with mSA-Atto 594 and Atto 647N-nanobody. Integrated density of LRRTM2 (red) and Nrx1β (green) molecules at axon/dendrite contacts are shown. **(b)** Size distribution of LRRTM2 nanodomains was measured by uPAINT (n=6 cells from 3 different experiments).

**a**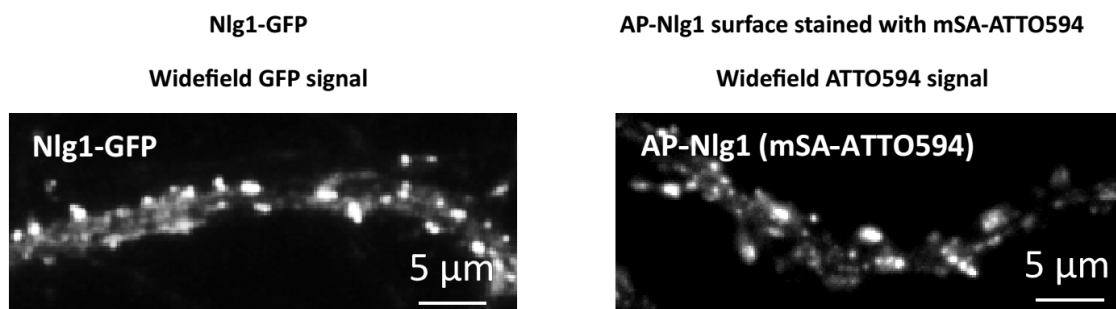**b**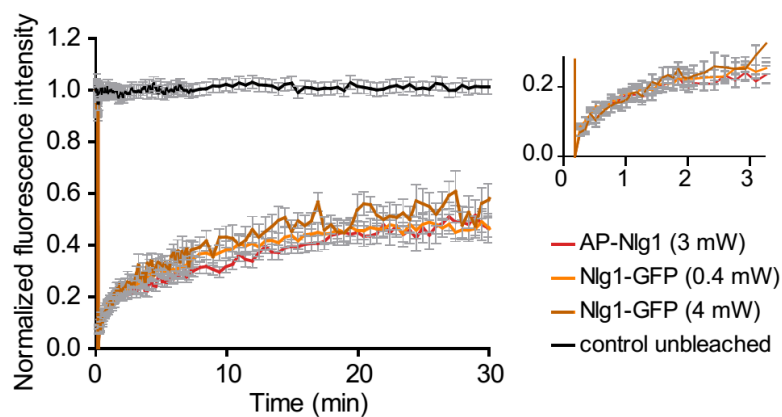**c**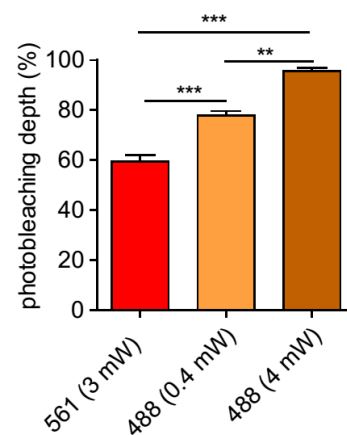

### Supplementary Figure 11. Comparison of AP-Nlg1 and Nlg1-GFP dynamics in mature hippocampal neurons by FRAP

**(a)** Representative wide field images of DIV 15 neurons expressing Nlg1-GFP, or AP-Nlg1, Homer1c-GFP, and BirA<sup>ER</sup> labeled with mSA-Atto 594. **(b)** FRAP experiments were performed on Nlg1-GFP using a low 488 nm laser power (0.4mW) or a high 488 nm laser power (4mW); and AP-Nlg1 labeled with mSA-Atto594 using a 3 mW 561 nm laser power. Corresponding normalized fluorescence recovery curves are shown. (AP-Nlg1, n=25; Nlg1-GFP (0.4mW), n=27; Nlg1-GFP (4mW), n=11). **(c)** Corresponding percentage of photobleaching in each of the three conditions measured by dividing the mean fluorescent baseline by the intensity after photobleaching (AP-Nlg1, n=25; Nlg1-GFP (0.4mW), n=27; Nlg1-GFP (4mW), n=11; \*\*\* p< 0.0001, 1-way ANOVA). Data are from 3 different experiments for AP-Nlg1 and 2 different experiments for Nlg1-GFP.
